# Supplementary material for: Oscillating lncRNA Platr4 regulates NLRP3 inflammasome to ameliorate nonalcoholic steatohepatitis in mice
Source: PubMed Central journal article supplement (PMC7681083; doi:10.7150/thno.50281), 2021-01-01
Supplement: thnov11p0426s1.pdf [file thnov11p0426s1.pdf]

## **Supplementary Information**

**Oscillating lncRNA *Platr4* regulates NLRP3 inflammasome to ameliorate nonalcoholic steatohepatitis in mice**

**Figure S1.** Plasma ALT/AST activities and hepatic triglyceride level in wild-type (WT) mice fed a normal or MCD diet. Data are mean  $\pm$  SD ( $n = 8$ ). \* $p < 0.05$  (t-test).

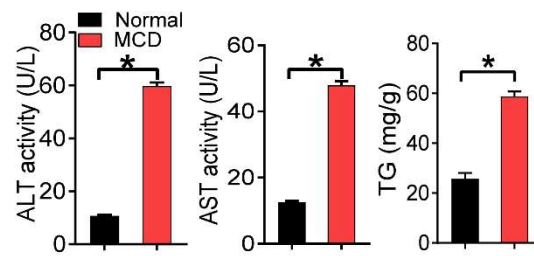

**Figure S2.** Hepatic mRNA expressions of inflammatory factors (*IL-1 $\beta$* , *IL-6*, *Tnf $\alpha$*  and *IL-18*) (left panel) and pro-fibrotic genes ( *$\alpha$ -SMA*, *Col1a1* and *Tgf- $\beta$ 1*) (right panel) in WT mice fed a normal or MCD diet. Data are mean  $\pm$  SD ( $n = 8$ ). \* $p < 0.05$  (t-test).

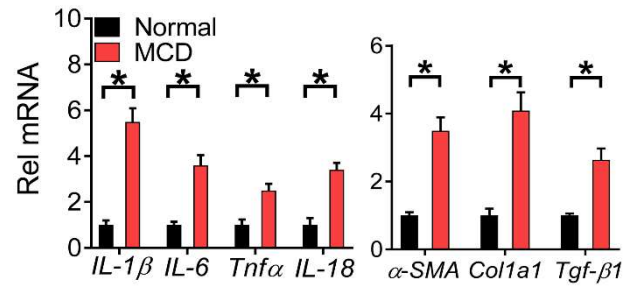

**Figure S3.** KEGG analysis of MCD-induced differentially expressed genes in the livers of WT mice.

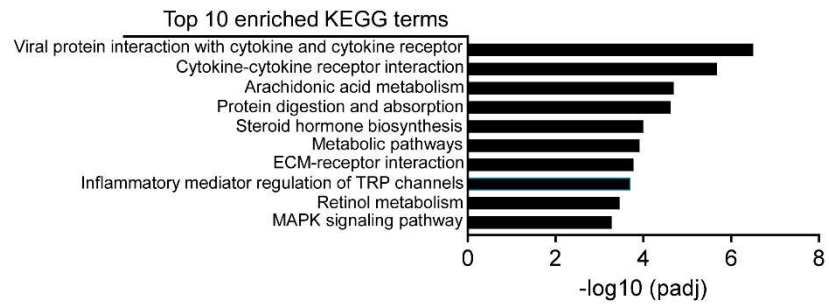

**Figure S4. (A)** Predicted coding probability of *Platr4*, *Neat1* and *Gapdh* using the CPAT tool. **(B)** Coding potential scores of *Platr4*, *Neat1* and *Gapdh* predicted by the CPC calculator. CPAT, coding potential assessment tool; CPC, coding potential calculator.

**A**

| CPAT | LncRNA/gene   | C/NC      | Coding probability |
|------|---------------|-----------|--------------------|
|      | <i>Platr4</i> | noncoding | 0.02               |
|      | <i>Neat1</i>  | noncoding | 0.07               |
|      | <i>Gapdh</i>  | coding    | 0.10               |

**B**

| CPC | LncRNA/gene   | C/NC      | Coding potential score |
|-----|---------------|-----------|------------------------|
|     | <i>Platr4</i> | noncoding | -0.20                  |
|     | <i>Neat1</i>  | noncoding | -0.06                  |
|     | <i>Gapdh</i>  | coding    | 13.62                  |

**Figure S5.** GO analysis of differentially expressed genes in *Platr4*-overexpressed versus control BMDMs after 8-h LPS (500 ng/ml) treatment.

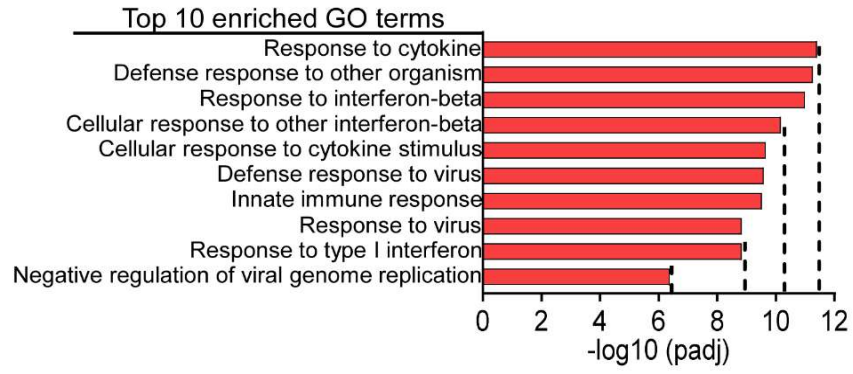

**Figure S6. (A)** Schematic of CRISPR/Cas9-mediated genome engineering for *Platr4* knockout mice. **(B)** Validation of *Platr4* knockout efficiency. Data are mean  $\pm$  SD ( $n = 8$ ). N.D., not detected.

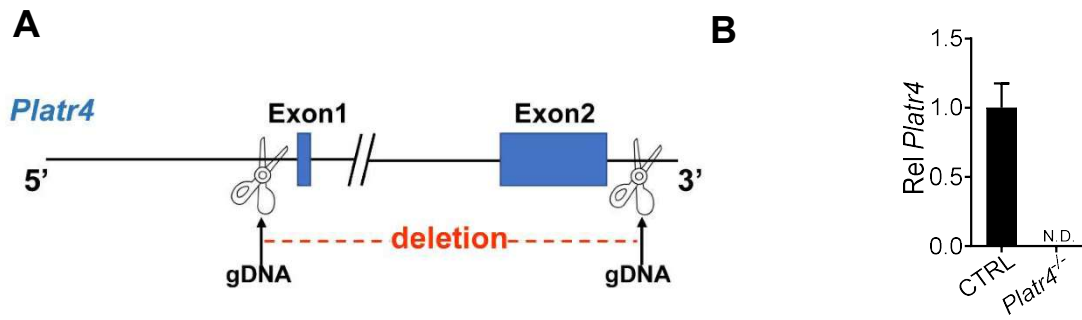

**Figure S7.** Effects of *Platr4* knockout on expression of the neighbor gene *Jade1*. Data are mean  $\pm$  SD ( $n = 8$ ).

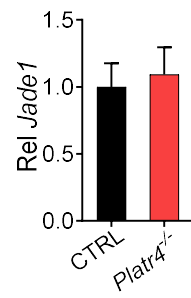



**Figure S8.** Effects of Rxr $\alpha$  knock-down on NF- $\kappa$ B target genes (*Nlrp3*, *IL-1 $\beta$* , *IL-6*, *Tnf $\alpha$*  and *IL-18*) in LPS-stimulated BMDMs. Data are mean  $\pm$  SD ( $n = 3$ ). \* $p < 0.05$  (t-test).

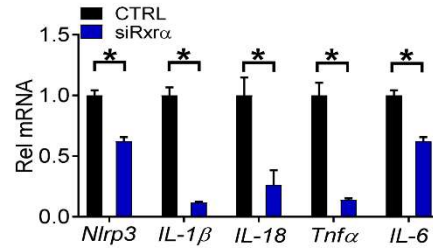

**Figure S9. (A)** Effects of *Rxrα* on the NF-κB-dependent reporter activity in BMDMs. Data are mean ± SD ( $n = 6$ ). \* $p < 0.05$  (one-way ANOVA with Bonferroni post hoc test). **(B)** Effects of *Rxrα* and/or p65 on the *Nlrp3* reporter activity in BMDMs. Data are mean ± SD ( $n = 6$ ). \* $p < 0.05$  (one-way ANOVA with Bonferroni post hoc test).

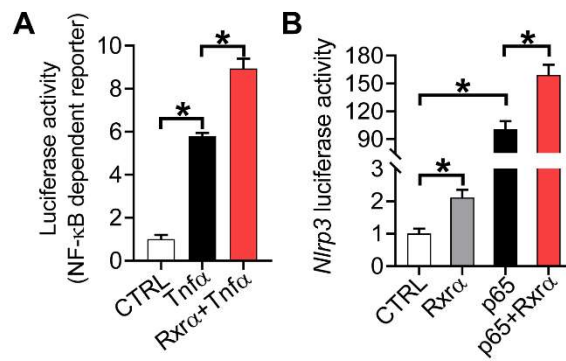

**Figure S10.** Recruitment of p65 protein to the  $\kappa$ B sites of *Nlrp3* and *mCSF* promoter (two NF- $\kappa$ B target genes) in *Rxr $\alpha$*  knocked-down BMDMs. Data are mean  $\pm$  SD ( $n = 3$ ). \* $p < 0.05$  (two-way ANOVA and Bonferroni post hoc test).

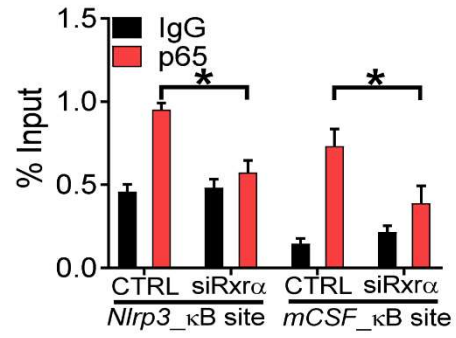

**Figure S11.** Effects of *Platr4* overexpression and knockdown on *Rxr $\alpha$*  expression in BMDMs. Data are mean  $\pm$  SD ( $n = 3$ ).

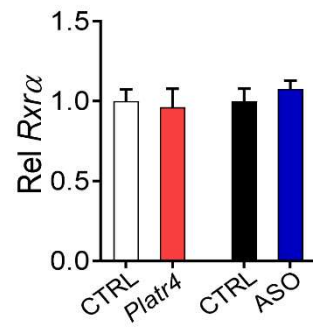

**Figure S12.** Hepatic *Platr4* expression in wild-type mice on day 15 after a single injection of AAV8.TBG.*Platr4* or control vector. Data are mean  $\pm$  SD ( $n = 8$ ). \* $p < 0.05$  (t-test).

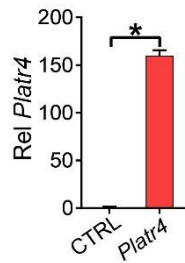

**Table S1.** List of candidate proteins interacting with *Platr4* from mass spectrometric analysis

| <b>Candidate proteins</b>     | <b>Mass</b>  | <b>Score</b> | <b>emPAI</b> |
|-------------------------------|--------------|--------------|--------------|
| Mthfd1                        | 82503        | 189          | 0.26         |
| Fdps                          | 13980        | 88           | 0.24         |
| Psmc7                         | 36574        | 76           | 0.09         |
| Taok3                         | 64413        | 75           | 0.10         |
| Sntb1                         | 58444        | 57           | 0.06         |
| Hsd17b2                       | 42436        | 56           | 0.16         |
| <b>Rxr<math>\alpha</math></b> | <b>51925</b> | <b>50</b>    | <b>0.13</b>  |
| Eif1b                         | 11465        | 48           | 0.30         |
| Ube2t                         | 8184         | 42           | 0.43         |
| Metap2                        | 21275        | 38           | 0.34         |
| Bard1                         | 85683        | 34           | 0.04         |
| Ilf3                          | 18830        | 33           | 0.18         |
| Psmc11                        | 9907         | 33           | 0.35         |
| Pym1                          | 22676        | 32           | 0.15         |
| Eif3e                         | 52587        | 30           | 0.06         |
| Rbm42                         | 47298        | 27           | 0.07         |
| Pxmp4                         | 10473        | 22           | 0.33         |

**Table S2.** Sequences of antisense oligonucleotide (ASO) and siRNA

| <b>Name</b>               | <b>Sequences (5'-3')</b> |
|---------------------------|--------------------------|
| Negative control (ASO-NC) | TGGGACGCCTGGGTACAC       |
| ASO                       | CAAGTAAGATGGCTCAGTGC     |
| Negative control (si-NC)  | UUCUCCGAACGUGUCACGUTT    |
| siRev-erb $\alpha$        | CUUCGUUGUUCAACGUGAATT    |
| siBmal1                   | GCUCUUUCUUCUGUAGAAUTT    |
| siRrx $\alpha$            | CCAUCGACACCUUCCUCAUdTdT  |

**Table S3** Sequences of primers for qPCR and PCR analyses

| <b>Name</b>                       | <b>Forward (5'-3' sequence)</b> | <b>Reverse (5'-3' sequence)</b> |
|-----------------------------------|---------------------------------|---------------------------------|
| <i>Platr4</i>                     | ATGGAGGAGGAAGTGAAA              | TACCCAAGAAGCCTGTTA              |
| <i>Neat1</i>                      | TTGGGACAGTGGACGTGTGG            | TCAAGTGCCAGCAGACAGCA            |
| <i><math>\beta</math>-actin</i>   | TTGAACATGGCATTGTTACCAA          | TGGCATAGAGGTCTTTACGGA           |
| <i>Hmbs</i>                       | CCGAGCCAAGGACCAGGATA            | CTCCTTCCAGGTGCCTCAGA            |
| <i>Bmal1</i>                      | CTCCAGGAGGCAAGAAGATTC           | ATAGTCCAGTGAAGGAATG             |
| <i>Rev-erb<math>\alpha</math></i> | TTTTTCGCCGGAGCATCCAA            | ATCTCGGCAAGCATCCGTTG            |
| <i>IL-1<math>\beta</math></i>     | AATGCCACCTTTTGACAGTGATG         | AGCTTCTCCACAGCCACAAT            |
| <i>Nlrp3</i>                      | ATTACCCGCCCGAGAAAGG             | TCGCAGCAAAGATCCACACAG           |
| <i>Asc</i>                        | GACAGTACCAGGCAGTTCGT            | GAGTCCTTGCAGGTCAGGTT            |
| <i>IL-6</i>                       | ATCCAGTTGCCTTCTTGGGACTGA        | TAAGCCTCCGACTTGTGAAGTGGT        |
| <i>Tnfa</i>                       | AGGGTCTGGGCCATAGAACT            | CCACCACGCTCTTCTGTCTAC           |
| <i>IL-18</i>                      | TCAAAGTGCCAGTGAACCCC            | GGTCACAGCCAGTCCCTTAC            |
| <i>Rxra</i>                       | CTGTGCTATCTGTGGGGACC            | AGGCAGTCCTTGTGTCTCG             |
| <i>p65</i>                        | ACTGCCGGGATGGCTACTAT            | TCTGGATTCGCTGGCTAATGG           |
| <i><math>\alpha</math>-SMA</i>    | TGTGCTGGACTCTGGAGATG            | GAAGGAATAGCCACGCTCAG            |
| <i>Col1a1</i>                     | GCTCCTCTAGGGGCCACT              | CCACGTCTCACCATTGGGG             |
| <i>Tgf-<math>\beta</math>1</i>    | CTCCCGTGGCTTCTAGTGC             | GCCTTAGTTTGGACAGGATCTG          |
| <i>Jade1</i>                      | GCGTTAGGCTACGTGATATCC           | ACGCAGCATCCATATCATTGAG          |
| <b>For PCR genotyping</b>         |                                 |                                 |
| <i>Platr4</i>                     | TCAAGAGCGGACTGCACCGAAG          | TCTGGCCTCTTCTCCTTGGACATC        |
| <i>Platr4-He/Wt</i>               | TGCATTTGTTTTCTGTGTTCTTTAATCTC   |                                 |



**Table S4.** Sequences of primers for ChIP assays

| <b>Name</b>             | <b>Forward ( 5'-3' sequence)</b> | <b>Reverse ( 5'-3' sequence)</b> |
|-------------------------|----------------------------------|----------------------------------|
| <i>Asc</i> _κB site     | CAGCCTAGCCAAAAAGCCAA             | GCCCGCCAAGACCAGG                 |
| <i>Asc</i> _NB          | CTCCTGCCTCTGTCTCTCGTA            | CCAATACCCAGCATAGGGCTT            |
| <i>Nlrp3</i> _κB site   | GAGCCCTGAGGTTTCACTTTTTTC         | AGCTTGCATCACTGTCAAAGACG          |
| <i>Bmal1</i> _REV       | GATTGGTCGGAAAGTAGGTTAGT          | GTCGCACCACTAACCTACTTTCC          |
| <i>Platr4</i> _REV1     | ACTCACAACCTCCACTACTTCGT          | CTTTGAGCCCATGAAAATACACA          |
| <i>Platr4</i> _REV2     | GAGCGGACTGCACCGAAG               | GGAAGGGGATTCTGGGTAGTG            |
| <i>Platr4</i> _NB       | ACATAGTCTTTAGTCTTTTGAGGC         | AGCAGTGGAGTCTGAAGGAT             |
| <i>Platr4</i> _κB site1 | TCCCTTTCCTCATTTC                 | GGAGTAGGTGGGTTGGTG               |
| <i>Platr4</i> _κB site2 | GTGTAGTCCCGGAAATCC               | CCTTGCTAGACGGTGGTG               |
| <i>mCSF</i> _κB site    | GGCCTCTGGGGTGTAGTAT              | CCGAGGCAAACCTTCACTTT             |
